# Supplementary material for: Synthesis of multicarboxylic acid appended imidazolium ionic liquids and their application in palladium-catalyzed selective oxidation of styrene
Source: Royal Society of Chemistry journal article supplement (doi:10.1039/b702573d), 2007-01-01
Supplement: b702573d.pdf [file b702573d.pdf]

## Synthesis of multicarboxylic acid appended imidazolium ionic liquids and their application in palladium-catalyzed selective oxidation of styrene

Xuehui Li,<sup>a\*</sup> Weiguo Geng<sup>a</sup>, Jixiang Zhou<sup>a</sup>, Wei Luo<sup>a</sup>, Furong Wang<sup>a</sup>, Lefu Wang<sup>a</sup> and Shik Chi Tsang<sup>b\*</sup>

<sup>a</sup> School of Chemical and Energy Engineering, The Guangdong Provincial Laboratory of Green Chemical Technology, South China University of Technology, Guangzhou, 510640, P. R. China. Tel.: 86 20 8711 4707; Fax: 86 20 871 14707; E-mail address: [xuehui.li@reading.ac.uk](mailto:xuehui.li@reading.ac.uk)

<sup>b</sup> Surface and Catalysis Research Centre, School of Chemistry, University of Reading, Whiteknights, Reading, RG6 6AD, U.K. Tel: 0044 0118 378 6346; Fax: 0044 118 378 6632; E-mail address: [s.c.e.tsang@reading.ac.uk](mailto:s.c.e.tsang@reading.ac.uk)

### 1 Characterization data for multicarboxylic acid appended imidazolium ionic liquids

**3a:** <sup>1</sup>H NMR (DMSO-*d*<sub>6</sub>, δ ppm): 9.34 (1H, s), 7.92 (1H, s), 7.80 (1H, s), 5.95 (1H, t, *J* = 7.2 Hz, CH), 5.31 (2H, s), 4.19 (4H, m, OCH<sub>2</sub>), 4.06 (2H, q, *J* = 7.2 Hz, OCH<sub>2</sub>), 3.37 (2H, m, CH<sub>2</sub>), 1.20 (9H, m, CH<sub>3</sub>); <sup>13</sup>C NMR (DMSO-*d*<sub>6</sub>, δ ppm): 169.2, 167.1, 166.7, 138.6, 123.9, 122.2, 62.7, 62.1, 61.2, 57.8, 49.9, 35.8, 14.0, 13.9; IR (KBr, cm<sup>-1</sup>): 3147, 3108, 2985, 2941, 2875, 1741, 1638, 1561, 1469, 1401, 1379, 1352, 1220, 1178, 1097, 1020; ESI-MS: *m/z*, 327 [M-Cl]<sup>+</sup>; Anal. Calcd. for C<sub>15</sub>H<sub>23</sub>ClN<sub>2</sub>O<sub>6</sub> (362.81) (%): C 49.66, H 6.39, N 7.72; Found: C 49.72, H 6.46, N 7.79.

**4a:** <sup>1</sup>H NMR (DMSO-*d*<sub>6</sub>, δ ppm): 9.36 (s, 1H), 7.90 (s, 1H), 7.88 (s, 1H), 5.83 (1H, t, *J* = 7.2 Hz, CH), 4.27 (2H, q, *J* = 7.2 Hz, CH<sub>2</sub>), 4.19 (2H, q, *J* = 7.0 Hz, OCH<sub>2</sub>), 4.09 (2H, q, *J* = 7.1 Hz, OCH<sub>2</sub>), 3.37 (2H, d, *J* = 6.4 Hz, CH<sub>2</sub>), 1.43 (3H, t, *J* = 7.5 Hz, CH<sub>3</sub>), 1.20 (3H, t, *J* = 7.0 Hz, CH<sub>3</sub>), 1.16 (3H, t, *J* = 6.4 Hz, CH<sub>3</sub>); <sup>13</sup>C NMR (DMSO-*d*<sub>6</sub>, δ ppm): 169.6, 167.7, 137.3, 123.1, 122.7, 63.1, 61.5, 58.0, 45.1, 36.2, 15.6, 14.5, 14.4; IR (KBr, cm<sup>-1</sup>): 3138, 3072, 2984, 2941, 2909, 2875, 1738, 1632, 1570, 1558, 1468, 1448, 1399, 1378, 1356, 1270, 1212, 1169, 1097, 1071, 1022; ESI-MS: *m/z*, 269 [M-Br]<sup>+</sup>; Anal. calcd for C<sub>13</sub>H<sub>21</sub>BrN<sub>2</sub>O<sub>4</sub> (349.22) (%): C 44.71, H 6.06, N 8.02; Found: C 44.77, H 6.12, N 8.09.

**5a:**  $^1\text{H}$  NMR (DMSO- $d_6$ ,  $\delta$  ppm): 9.18 (1H, s), 7.83 (1H, s), 7.74 (1H, s), 5.26 (2H, s), 4.47 (2H, t,  $J = 6.6$  Hz), 4.21 (2H, q,  $J = 7.4$  Hz), 4.06 (2H, q,  $J = 7.1$  Hz), 2.99 (2H, t,  $J = 6.7$  Hz), 1.24 (3H, t,  $J = 7.1$  Hz), 1.16 (3H, t,  $J = 7.2$  Hz);  $^{13}\text{C}$  NMR (DMSO- $d_6$ ,  $\delta$  ppm): 170.8, 167.3, 138.2, 124.3, 122.8, 62.7, 61.3, 50.1, 45.4, 34.2, 14.4; IR (KBr,  $\text{cm}^{-1}$ ): 3147, 3081, 2985, 2941, 2875, 1733, 1638, 1567, 1450, 1399, 1378, 1344, 1296, 1224, 1169, 1098, 1065, 1020; ESI-MS:  $m/z$ , 255  $[\text{M}-\text{Cl}]^+$ ; Anal. calcd for  $\text{C}_{12}\text{H}_{19}\text{ClN}_2\text{O}_4$  (290.75) (%): C 49.57, H 6.59, N 9.63; Found: C 49.62, H 6.66, N 9.69.

**3b:**  $^1\text{H}$  NMR (DMSO- $d_6$ ,  $\delta$  ppm): 10.50-11.00 (broad signal, 3H), 9.29 (s, 1H), 7.88 (1H, s), 7.75 (1H, s), 5.75 (1H, t,  $J = 7.4$  Hz, CH), 5.18 (2H, s), 3.27 (2H, d,  $J = 7.4$  Hz,  $\text{CH}_2$ ).  $^{13}\text{C}$  NMR (DMSO- $d_6$ ,  $\delta$  ppm): 171.0, 170.0, 169.0, 138.4, 123.7, 122.2, 58.1, 50.0, 35.9; IR (KBr,  $\text{cm}^{-1}$ ): 3151, 3132, 3104, 3065, 2975, 1726, 1634, 1563, 1487, 1384, 1256, 1166, 1090, 1031; ESI-MS:  $m/z$ , 243  $[\text{M}-\text{Cl}]^+$ ; Anal. calcd for  $\text{C}_9\text{H}_{11}\text{ClN}_2\text{O}_6$  (278.65) (%): C 38.79, H 3.98, N 10.05; Found: C 38.83, H 4.02, N 10.11.

**4b:**  $^1\text{H}$  NMR (DMSO- $d_6$ ,  $\delta$  ppm): 10.50-11.00 (broad signal, 2H), 9.39 (1H, s), 7.91 (1H, s), 7.87 (1H, s), 5.66 (1H, t,  $J = 7.6$  Hz, CH), 4.27 (2H, q,  $J = 7.4$  Hz,  $\text{CH}_2$ ), 3.28 (2H, d,  $J = 6.7$  Hz,  $\text{CH}_2$ ), 1.42 (3H, t,  $J = 7.3$  Hz,  $\text{CH}_3$ ).  $^{13}\text{C}$  NMR (DMSO- $d_6$ ,  $\delta$  ppm): 171.3, 169.4, 137.2, 123.2, 122.4, 58.5, 45.0, 36.3, 15.6; IR (KBr,  $\text{cm}^{-1}$ ): 3152, 3133, 3106, 2990, 2949, 1732, 1633, 1559, 1410, 1356, 1269, 1228, 1166, 1116, 1029; ESI-MS:  $m/z$ , 213  $[\text{M}-\text{Br}]^+$ ; Anal. calcd for  $\text{C}_9\text{H}_{13}\text{BrN}_2\text{O}_4$  (293.12) (%): C 36.88, H 4.47, N 9.56; Found: C 36.93, H 4.52, N 9.63.

**5b:**  $^1\text{H}$  NMR (DMSO- $d_6$ ,  $\delta$  ppm): 10.50-11.00 (broad signal, 3H), 9.38 (1H, s), 7.86 (1H, s), 7.79 (1H, s), 5.21 (2H, s,  $\text{CH}_2$ ), 4.40 (2H, q,  $J = 6.7$  Hz,  $\text{CH}_2$ ), 2.90 (2H, d,  $J = 6.8$  Hz,  $\text{CH}_2$ );  $^{13}\text{C}$  NMR (DMSO- $d_6$ ,  $\delta$  ppm): 172.0, 168.4, 138.1, 124.3, 122.6, 50.3, 45.5, 34.5; IR (KBr,  $\text{cm}^{-1}$ ): 3141, 3114, 3082, 2990, 2954, 1723, 1632, 1567, 1456, 1409, 1341, 1295, 1220, 1191, 1168, 1113, 1062, 1029, 1019; ESI-MS:  $m/z$ , 199  $[\text{M}-\text{Cl}]^+$ ; Anal. calcd for  $\text{C}_8\text{H}_{11}\text{ClN}_2\text{O}_4$  (234.64) (%): C 40.95, H 4.73, N 11.94; Found: C 41.01, H 4.79, N 12.02.

**3c:**  $^1\text{H}$  NMR ( $\text{D}_2\text{O}$ ,  $\delta$  ppm): 8.79 (1H, s), 7.45 (1H, s), 7.41 (1H, s), 5.30 (1H, t,  $J = 7.4$  Hz, CH), 5.09 (2H, s,  $\text{CH}_2$ ), 3.18 (2H, d,  $J = 7.2$  Hz,  $\text{CH}_2$ ).  $^{13}\text{C}$  NMR ( $\text{D}_2\text{O}$ ,  $\delta$  ppm): 176.8, 175.2, 174.6, 139.5, 124.9, 123.5, 67.1, 47.2, 38.7; IR (KBr,  $\text{cm}^{-1}$ ): 3150, 3112, 2976, 2941, 1623, 1585, 1484,

1362, 1220, 1170; ESI-MS:  $m/z$ , 243  $[M+H]^+$ ; Anal. calcd for  $C_9H_{10}N_2O_6$  (242.19) (%): C 44.63, H 4.16, N 11.57; Found: C 44.68, H 4.19, N 11.65.

**4c**:  $^1H$  NMR ( $D_2O$ ,  $\delta$  ppm): 8.81 (1H, s), 7.46 (1H, s), 7.42 (1H, s), 5.22 (1H, t,  $J = 7.4$  Hz, CH), 4.15 (2H, q,  $J = 7.3$  Hz,  $CH_2$ ), 3.19 (2H, q,  $J = 16.6, 7.6$  Hz,  $CH_2$ ), 1.40 (3H, t,  $J = 7.3$  Hz,  $CH_3$ ).  $^{13}C$  NMR ( $D_2O$ ,  $\delta$  ppm): 176.6, 175.0, 138.3, 124.7, 124.4, 63.2, 47.7, 39.9, 17.0; IR (KBr,  $cm^{-1}$ ): 3151, 3133, 3106, 3066, 2992, 2976, 2940, 1675, 1563, 1430, 1341, 1258, 1166; ESI-MS:  $m/z$ , 213  $[M+H]^+$ ; Anal. calcd for  $C_9H_{12}N_2O_4$  (212.21) (%): C 50.94, H 5.70, N 13.20; Found: C 50.98, H 5.76, N 13.32.

**5c**:  $^1H$  NMR ( $D_2O$ ,  $\delta$  ppm): 8.75 (1H, s, H-2), 7.47 (1H, s), 7.38 (1H, s), 4.77 (2H, s), 4.43 (2H, t,  $J = 6.8$  Hz,  $CH_2$ ), 2.90 (2H, t,  $J = 6.9$  Hz,  $CH_2$ );  $^{13}C$  NMR ( $D_2O$ ,  $\delta$  ppm): 177.1, 173.5, 139.2, 125.3, 124.8), 53.4, 48.7, 37.4; IR (KBr,  $cm^{-1}$ ): 3163, 3132, 3098, 3042, 3003, 2953, 1625, 1560, 1435, 1338, 1255, 1168; ESI-MS:  $m/z$ , 199  $[M+H]^+$ ; Anal. calcd for  $C_8H_{10}N_2O_4$  (198.18) (%): C 48.49, H 5.09, N 14.14; Found: C 48.55, H 5.16, N 14.23.

**3d**:  $^1H$  NMR ( $DMSO-d_6$ ,  $\delta$  ppm): 9.21 (1H, s), 7.85 (1H, s), 7.70 (1H, s), 5.73 (1H, t,  $J = 7.3$  Hz, CH), 5.16 (2H, s,  $CH_2$ ), 3.24 (2H, d,  $J = 7.4$  Hz,  $CH_2$ ).  $^{13}C$  NMR ( $DMSO-d_6$ ,  $\delta$  ppm): 170.8, 168.6, 168.0, 138.4, 123.6, 122.2, 58.1, 50.0, 35.9; IR (KBr,  $cm^{-1}$ ): 3120, 3080, 3036, 3003, 1722, 1633, 1589, 1487, 1382, 1216, 1166, 1150, 1067, 1032; ESI-MS:  $m/z$ , 243  $[M-BF_4]^+$ ; Anal. calcd for  $C_9H_{11}BF_4N_2O_6$  (330.00) (%): C 32.76, H 3.36, N 8.49; Found: C 32.80, H 3.40, N 8.53.

**3e**:  $^1H$  NMR ( $DMSO-d_6$ ,  $\delta$  ppm): 9.18 (1H, s), 7.82 (1H, s), 7.68 (1H, s), 5.70 (1H, t,  $J = 7.1$  Hz, CH), 5.14 (2H, s,  $CH_2$ ), 3.24 (2H, d,  $J = 7.3$  Hz,  $CH_2$ ).  $^{13}C$  NMR ( $DMSO-d_6$ ,  $\delta$  ppm): 170.4, 168.2, 167.5, 137.9, 123.3, 121.8, 57.8, 49.7, 35.6; IR (KBr,  $cm^{-1}$ ): 3151, 3132, 3104, 3065, 2975, 2939, 1723, 1637, 1548, 1489, 1379, 1254, 1168, 1058, 967; ESI-MS:  $m/z$ , 243  $[M-PF_6]^+$ ; Anal. calcd for  $C_9H_{11}PF_6N_2O_6$  (388.16) (%): C 27.85, H 2.86, N 7.22; Found: C 27.90, H 2.91, N 7.28.

**3f**:  $^1H$  NMR ( $DMSO-d_6$ ,  $\delta$  ppm): 9.27 (1H, s), 7.86 (1H, s), 7.72 (1H, s), 5.72 (1H, t,  $J = 7.4$  Hz, CH), 5.16 (2H, s,  $CH_2$ ), 3.26 (2H, d,  $J = 7.4$  Hz,  $CH_2$ ).  $^{13}C$  NMR ( $DMSO-d_6$ ,  $\delta$  ppm): 170.8,

168.6, 168.0, 164.9, 138.3, 123.7, 122.2, 119.1(CF<sub>3</sub>), 58.1, 50.0, 35.9; IR (KBr, cm<sup>-1</sup>): 3142, 3102, 2975, 2940, 1723, 1635, 1488, 1383, 1246, 1176, 1111, 1061; ESI-MS: *m/z*, 243 [M-CF<sub>3</sub>CO<sub>2</sub>]<sup>+</sup>; Anal. calcd for C<sub>11</sub>H<sub>11</sub>F<sub>3</sub>N<sub>2</sub>O<sub>8</sub> (356.21) (%): C 37.09, H 3.11, N 7.86; Found: C 37.09, H 3.14, N 7.87.

**3g**: <sup>1</sup>H NMR (DMSO-*d*<sub>6</sub>, δ ppm): 9.26 (1H, s), 7.85 (1H, s), 7.71 (1H, s), 5.73 (1H, t, *J* = 7.3 Hz, CH), 5.15 (2H, s, CH<sub>2</sub>), 3.25 (2H, d, *J* = 7.3 Hz, CH<sub>2</sub>). <sup>13</sup>C NMR (DMSO-*d*<sub>6</sub>, δ ppm): 170.8, 168.5, 168.0, 138.2 (CF<sub>3</sub>), 138.0, 123.7, 122.2, 58.1, 50.0, 35.9; IR (KBr, cm<sup>-1</sup>): 3143, 3077, 2979, 1726, 1637, 1545, 1490, 1382, 1379, 1261, 1165, 1061, 1031; ESI-MS: *m/z*, 243 [M-CF<sub>3</sub>SO<sub>3</sub>]<sup>+</sup>; Anal. calcd for C<sub>10</sub>H<sub>11</sub>F<sub>3</sub>N<sub>2</sub>O<sub>9</sub>S (392.27) (%): C 30.62, H 2.83, N 7.14; Found: C 30.61, H 2.89, N 7.16.

**4d**: <sup>1</sup>H NMR (DMSO-*d*<sub>6</sub>, δ ppm): 9.30 (1H, s), 7.88 (1H, s), 7.82 (1H, s), 5.64 (1H, t, *J* = 7.6 Hz, CH), 4.25 (2H, q, *J* = 7.0 Hz, CH<sub>2</sub>), 3.25 (2H, d, *J* = 7.0 Hz, CH<sub>2</sub>), 1.41 (3H, t, *J* = 7.0 Hz, CH<sub>3</sub>). <sup>13</sup>C NMR (DMSO-*d*<sub>6</sub>, δ ppm): 171.3, 169.3, 137.1, 123.2, 122.4, 58.5, 45.0, 36.3, 15.6; IR (KBr, cm<sup>-1</sup>): 3145, 3123, 3074, 2990, 2976, 1723, 1633, 1564, 1487, 1378, 1252, 1164, 1150, 1072, 1060, 1031; ESI-MS: *m/z*, 213 [M-BF<sub>4</sub>]<sup>+</sup>; Anal. calcd for C<sub>9</sub>H<sub>13</sub>BF<sub>4</sub>N<sub>2</sub>O<sub>4</sub> (300.02) (%): C 36.03, H 4.37, N 9.34; Found: C 36.08, H 4.42, N 9.41.

**4e**: <sup>1</sup>H NMR (DMSO-*d*<sub>6</sub>, δ ppm): 9.28 (1H, s), 7.85 (1H, s), 7.80 (1H, s), 5.61 (1H, t, *J* = 7.6 Hz, CH), 4.23 (2H, q, *J* = 7.0 Hz, CH<sub>2</sub>), 3.24 (2H, d, *J* = 7.0 Hz, CH<sub>2</sub>), 1.40 (3H, t, *J* = 7.0 Hz, CH<sub>3</sub>). <sup>13</sup>C NMR (DMSO-*d*<sub>6</sub>, δ ppm): 170.9, 168.9, 136.7, 122.8, 122.0, 58.2, 44.7, 36.0, 15.2; IR (KBr, cm<sup>-1</sup>): 3152, 3133, 3106, 2990, 2949, 1732, 1636, 1566, 1488, 1376, 1254, 1166, 1116, 1057, 959, 831; ESI-MS: *m/z*, 213 [M-PF<sub>6</sub>]<sup>+</sup>; Anal. calcd for C<sub>9</sub>H<sub>13</sub>F<sub>6</sub>N<sub>2</sub>O<sub>4</sub>P (358.18) (%): C 30.18, H 3.66, N 7.82; Found: C 30.23, H 3.71, N 7.89.

**4f**: <sup>1</sup>H NMR (DMSO-*d*<sub>6</sub>, δ ppm): 9.37 (1H, s), 7.89 (1H, s), 7.84 (1H, s), 5.63 (1H, t, *J* = 7.0 Hz, CH), 4.25 (2H, q, *J* = 7.0 Hz, CH<sub>2</sub>), 3.27 (2H, d, *J* = 7.0 Hz, CH<sub>2</sub>), 1.41 (3H, t, *J* = 7.0 Hz, CH<sub>3</sub>). <sup>13</sup>C NMR (DMSO-*d*<sub>6</sub>, δ ppm): 171.3, 169.3, 164.8, 137.1, 123.2, 122.4, 119.1(CF<sub>3</sub>), 58.5, 45.0, 36.3, 15.6; IR (KBr, cm<sup>-1</sup>): 3163, 3135, 3114, 3004, 2990, 2943, 1722, 1624, 1560, 1428, 1314, 1278, 1246, 1199, 1137, 1116, 1036, 707; ESI-MS: *m/z*, 213 [M-CF<sub>3</sub>CO<sub>2</sub>]<sup>+</sup>; Anal. calcd for C<sub>11</sub>H<sub>13</sub>F<sub>3</sub>N<sub>2</sub>O<sub>6</sub> (326.23) (%): C 40.50, H 4.02, N 8.59; Found: C 40.61, H 4.00, N 8.57.

**4g:**  $^1\text{H}$  NMR (DMSO- $d_6$ ,  $\delta$  ppm): 9.36 (1H, s), 7.88 (1H, s), 7.83 (1H, s), 5.64 (1H, t,  $J = 7.6$  Hz, CH), 4.24 (2H, q,  $J = 7.3$  Hz,  $\text{CH}_2$ ), 3.26 (2H, d,  $J = 7.0$  Hz,  $\text{CH}_2$ ), 1.40 (3H, t,  $J = 7.0$  Hz,  $\text{CH}_3$ ).  $^{13}\text{C}$  NMR (DMSO- $d_6$ ,  $\delta$  ppm): 171.3, 169.2, 137.0, 123.2, 122.4, 138.2 ( $\text{CF}_3$ ), 58.5, 45.0, 36.3, 15.6; IR (KBr,  $\text{cm}^{-1}$ ): 3144, 3105, 3078, 2989, 1724, 1637, 1490, 1441, 1383, 1262, 1227, 1165, 1066, 1032, 757; ESI-MS:  $m/z$ , 213 [ $\text{M-CF}_3\text{SO}_3$ ] $^+$ ; Anal. calcd for  $\text{C}_{10}\text{H}_{13}\text{F}_3\text{N}_2\text{O}_7\text{S}$  (362.28) (%): C 33.15, H 3.62, N 7.73; Found: C 33.20, H 3.60, N 7.69.

**5d:**  $^1\text{H}$  NMR (DMSO- $d_6$ ,  $\delta$  ppm): 9.29 (1H, s), 7.83 (1H, s), 7.74 (1H, s), 5.19 (2H, s,  $\text{CH}_2$ ), 4.38 (2H, q,  $J = 7.0$  Hz,  $\text{CH}_2$ ), 2.87 (2H, d,  $J = 7.0$  Hz,  $\text{CH}_2$ );  $^{13}\text{C}$  NMR (DMSO- $d_6$ ,  $\delta$  ppm): 172.0, 168.3, 138.1, 124.2, 122.6, 50.3, 45.5, 34.5; IR (KBr,  $\text{cm}^{-1}$ ): 3151, 3105, 2980, 2904, 1723, 1631, 1568, 1416, 1356, 1248, 1164, 1150, 1113, 1062; ESI-MS:  $m/z$ , 199 [ $\text{M-BF}_4$ ] $^+$ ; Anal. calcd for  $\text{C}_8\text{H}_{11}\text{BF}_4\text{N}_2\text{O}_4$  (285.99) (%): C 33.60, H 3.88, N 9.80; Found: C 33.66, H 3.93, N 9.85.

**5e:**  $^1\text{H}$  NMR (DMSO- $d_6$ ,  $\delta$  ppm): 9.27 (1H, s), 7.80 (1H, s), 7.72 (1H, s), 5.16 (2H, s), 4.36 (2H, q,  $J = 7.0$  Hz,  $\text{CH}_2$ ), 2.86 (2H, d,  $J = 7.0$  Hz,  $\text{CH}_2$ );  $^{13}\text{C}$  NMR (DMSO- $d_6$ ,  $\delta$  ppm): 171.6, 167.9, 137.6, 123.9, 122.2, 50.1, 45.2, 34.2; IR (KBr,  $\text{cm}^{-1}$ ): 3152, 3114, 3083, 2990, 2950, 1723, 1634, 1567, 1461, 1413, 1354, 1249, 1166, 1115, 1058, 959, 831; ESI-MS:  $m/z$ , 199 [ $\text{M-PF}_6$ ] $^+$ ; Anal. calcd for  $\text{C}_8\text{H}_{11}\text{F}_6\text{N}_2\text{O}_4\text{P}$  (344.15) (%): C 27.92, H 3.22, N 8.14; Found: C 27.99, H 3.28, N 8.22.

**5f:**  $^1\text{H}$  NMR (DMSO- $d_6$ ,  $\delta$  ppm): 9.36 (1H, s), 7.84 (1H, s), 7.76 (1H, s), 5.18 (2H, s), 4.38 (2H, q,  $J = 7.0$  Hz,  $\text{CH}_2$ ), 2.89 (2H, d,  $J = 7.0$  Hz,  $\text{CH}_2$ );  $^{13}\text{C}$  NMR (DMSO- $d_6$ ,  $\delta$  ppm): 172.0, 168.3, 164.7, 138.0, 124.3, 122.6, 119.2 ( $\text{CF}_3$ ), 50.3, 45.5, 34.5; IR (KBr,  $\text{cm}^{-1}$ ): 3151, 2945, 1718, 1566, 1418, 1163, 1062, 707; ESI-MS:  $m/z$ , 199 [ $\text{M-CF}_3\text{CO}_2$ ] $^+$ ; Anal. calcd for  $\text{C}_{10}\text{H}_{11}\text{F}_3\text{N}_2\text{O}_6$  (312.20) (%): C 38.47, H 3.55, N 8.97; Found: C 38.68, H 3.57, N 8.96.

**5g:**  $^1\text{H}$  NMR (DMSO- $d_6$ ,  $\delta$  ppm): 9.35 (1H, s), 7.83 (1H, s), 7.75 (1H, s), 5.19 (2H, s), 4.37 (2H, q,  $J = 7.0$  Hz), 2.88 (2H, d,  $J = 7.0$  Hz);  $^{13}\text{C}$  NMR (DMSO- $d_6$ ,  $\delta$  ppm): 172.0, 168.2, 138.2 ( $\text{CF}_3$ ), 137.9, 124.3, 122.6, 50.3, 45.5, 34.5; IR (KBr,  $\text{cm}^{-1}$ ): 3164, 2990, 1728, 1662, 1436, 1175, 1168, 1113, 1062, 1029, 707; ESI-MS:  $m/z$ , 199 [ $\text{M-CF}_3\text{SO}_3$ ] $^+$ ; Anal. calcd for  $\text{C}_9\text{H}_{11}\text{F}_3\text{N}_2\text{O}_7\text{S}$  (348.26) (%): C 31.04, H 3.18, N 8.04; Found: C 31.05, H 3.19, N 8.05.

## 2. IR spectrum of **3b**, **4b** and **5b**

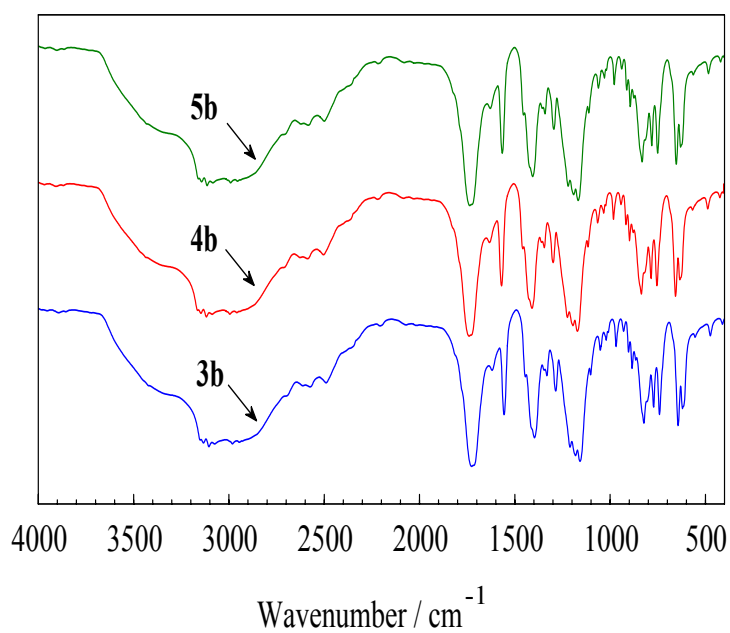

Figure S1 IR spectrum of **3b**, **4b** and **5b**

## 3. TG curves for **3b**, **3d**, **3e** and **3f**

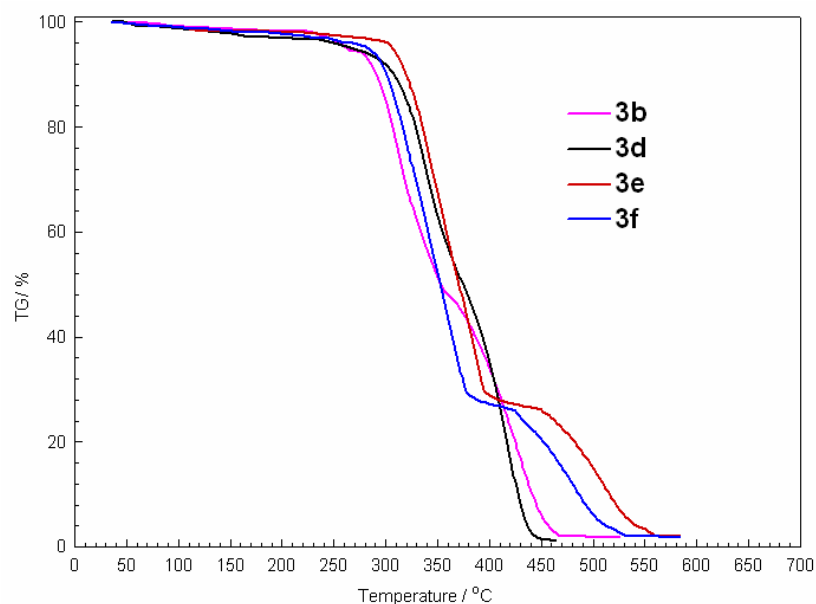

Figure S2 TG curves for **3b**, **3d**, **3e** and **3f**

## 4. DSC investigation of McaILs

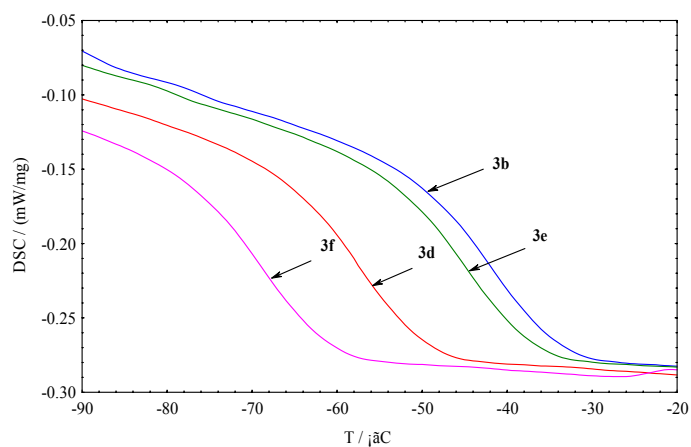

Fig.S3 DSC curves for the glass transitions of **3b**, **3d~3f** at cooling stage

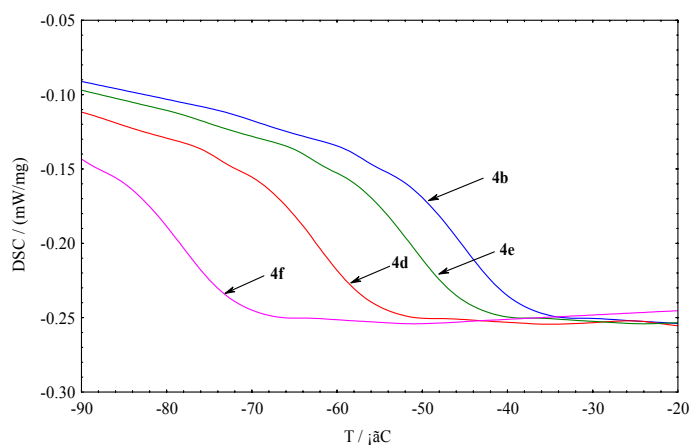

Fig.S4 DSC curves for the glass transitions of **4b**, **4d~4f** at cooling stage

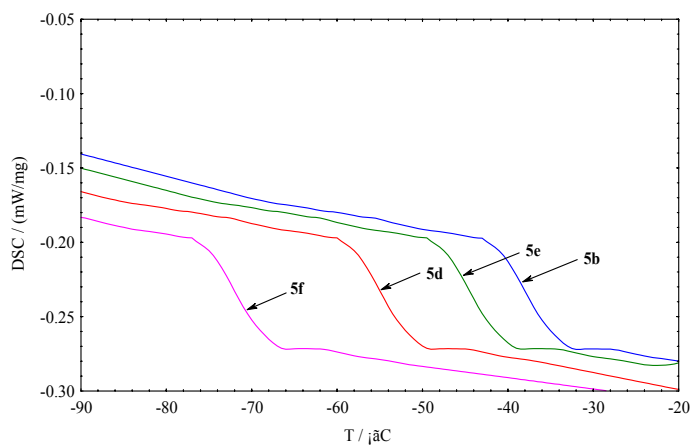

Fig.S5 DSC curves for the glass transitions of **5b**, **5d~5f** at cooling stage

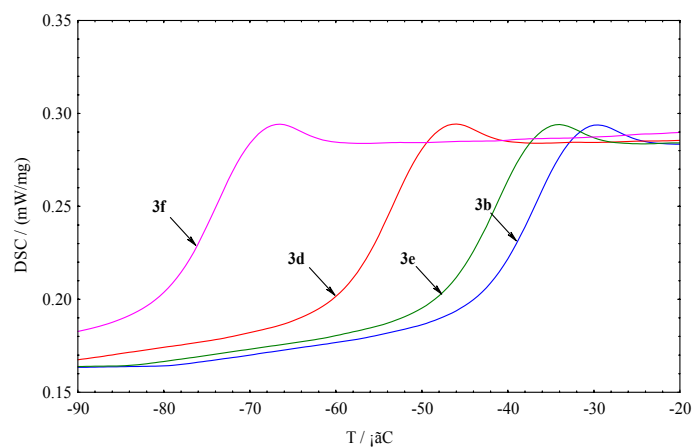

Fig.S6 DSC curves for the glass transitions of **3b**, **3d~3f** at heating stage

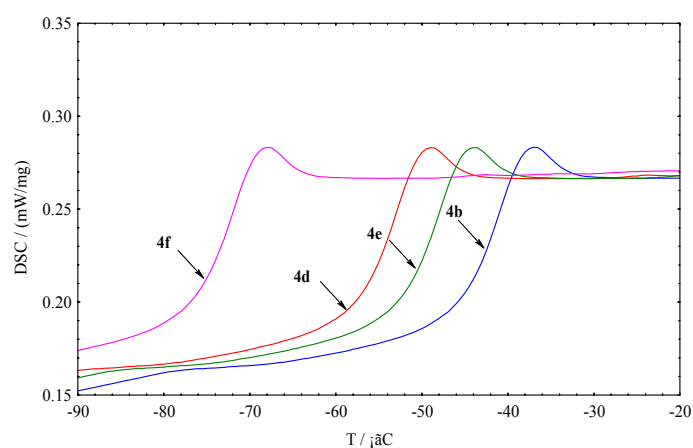

Fig.S7 DSC curves for the glass transitions of **4b**, **4d~4f** at heating stage

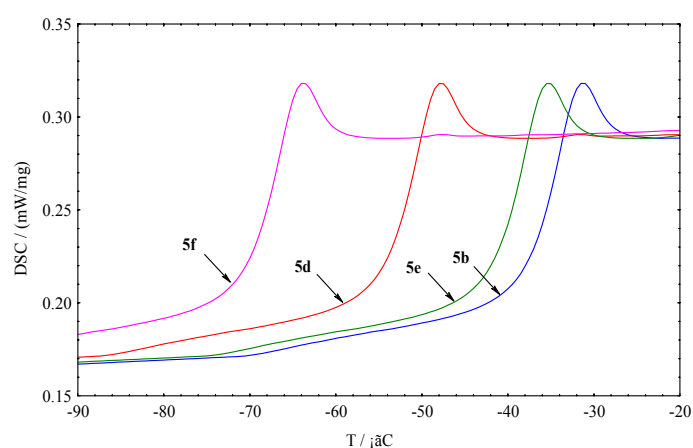

Fig.S8 DSC curves for the glass transitions of **5b**, **5d~5f** at heating stage
